# Supplementary material
Source: publisher figshare collection journal article supplement (https://acs.figshare.com/ndownloader/files/27621428)
Supplement: Supplementary file 1 [file 27621428]

Supporting Information for

Light-driven Rapid Peeling of Photochromic Diarylethene  
Single Crystals

Masato Tamaoki, Daichi Kitagawa, and Seiya Kobatake\*

Department of Applied Chemistry, Graduate School of Engineering Osaka City University, 3-3-138 Sugimoto, Sumiyoshi-ku, Osaka 558-8585, Japan

## Contents

### 1. Table

**Table S1.** Crystallographic data of crystal **1a**

### 2. Figures

**Figure S1.** (a) PXRD pattern of crystal **1a** on the well-developed face of the crystals, (b) the pattern of slightly crushed crystal **1a**, and (c) the actual crystal shape and face indices.

**Figure S2.** (a) Setup for the measurement of polarized absorption spectra, (b) optical microphotographs of crystal **1a** under polarized light before and after UV irradiation, (c) polarized absorption spectra, and (d) the molecular packing of **1a** viewed from the (001) plane. The blue arrows in (d) show the direction of the long axis of the molecule.

**Figure S3.** Photoinduced peeling of crystal **1a** upon irradiation with 365 nm light to the lateral face of the crystal. See **Video S3** in Supporting Information.

**Figure S4.** Optical microphotographs of (a) the peel and (b) the lateral face of the parent crystal of **1a** under crossed Nicols.

**Figure S5.** Representative HPLC chart of (a) crystals **1a** before UV irradiation and (b) the peels eliminated from the parent crystal after UV light irradiation. The peaks at 15.27 min and at 13.32 min indicate **1a** and **1b**, respectively. Crystals **1a** before UV light irradiation was composed of substantially **1a** (**1a** > 99%). On the other hand, the peels after UV light irradiation were composed of **1a** and **1b** in the ratio of 78:22. The composition of **1b** was ranging from 16 to 28% by measuring for several times with different peels.

**Figure S6.** Definition of (a) crystal size; length, width, and thickness, (b) induction period (c) curvature radius  $1/R$ ; reciprocal of radius  $R$  of inscribed circle, and thickness of peel.

**Figure S7.** Diffuse reflectance spectrum of crystal **1a** with barium sulfate.

**Figure S8.** Schematic illustration of the preparation of the straightened peel by visible light irradiation.

**Figure S9.** (a) Setup for determining the light intensity, (b) the enlarged picture of the fluorescent

paper irradiated with high-power 365 nm light, (c) the fluorescence image of the fluorescent paper taken by a digital microscope, and (d) the irradiation intensity relative to distance from the center of the beam.

### 3. Videos (Separate avi files)

**Video S1.** Real-time movie for photoinduced rapid peeling of a diarylethene single crystal of **1a** taken by a high-speed camera (black and white).

**Video S2.** Slow-motion movie with 267 times slowdown during 0.96075-0.97075 s in Video S1.

**Video S3.** Slow-motion movie with 4800 times slowdown for photoinduced rapid peeling (from start to end of the peeling) of a diarylethene single crystal of **1a** taken by a high-speed camera (black and white).

**Video S4.** Slow-motion movie with 6000 times slowdown for photoinduced rapid peeling and winding of crystal **1a** taken by a high-speed camera (black and white).

**Video S5.** Real-time movie for separation shearing of crystal **1a** upon irradiation with 365 nm light to the well-developed face.

**Video S6.** Slow-motion movie with 2000 times slowdown for jumping of crystal **1a** upon irradiation with 365 nm light to the well-developed face, taken by a high-speed camera (black and white).

**Video S7.** Real-time movie for high-power radiation induced bending of the peel upon irradiation with 365 nm light.

**Table S1.** Crystallographic data of crystal **1a**

|                                          |                                                                              |
|------------------------------------------|------------------------------------------------------------------------------|
| Formula                                  | C <sub>37</sub> H <sub>26</sub> F <sub>6</sub> O <sub>2</sub> S <sub>2</sub> |
| Formula weight                           | 680.70                                                                       |
| Temperature / K                          | 150(2)                                                                       |
| Crystal system                           | Monoclinic                                                                   |
| Space group                              | <i>P</i> 2 <sub>1</sub> / <i>n</i>                                           |
| <i>a</i> / Å                             | 13.208(10)                                                                   |
| <i>b</i> / Å                             | 6.195(5)                                                                     |
| <i>c</i> / Å                             | 38.28(3)                                                                     |
| $\alpha$ / °                             | 90.00                                                                        |
| $\beta$ / °                              | 96.058(9)                                                                    |
| $\gamma$ / °                             | 90.00                                                                        |
| Volume / Å <sup>3</sup>                  | 3114(4)                                                                      |
| <i>Z</i>                                 | 4                                                                            |
| Density / g cm <sup>-3</sup>             | 1.452                                                                        |
| Goodness-of-fit on <i>F</i> <sup>2</sup> | 1.084                                                                        |
| <i>R</i> [ <i>I</i> > 2σ( <i>I</i> )]    | <i>R</i> <sub>1</sub> = 0.0593, <i>wR</i> <sub>2</sub> = 0.1533              |
| <i>R</i> (all data)                      | <i>R</i> <sub>1</sub> = 0.0739, <i>wR</i> <sub>2</sub> = 0.1658              |
| CCDC No.                                 | 2060232                                                                      |

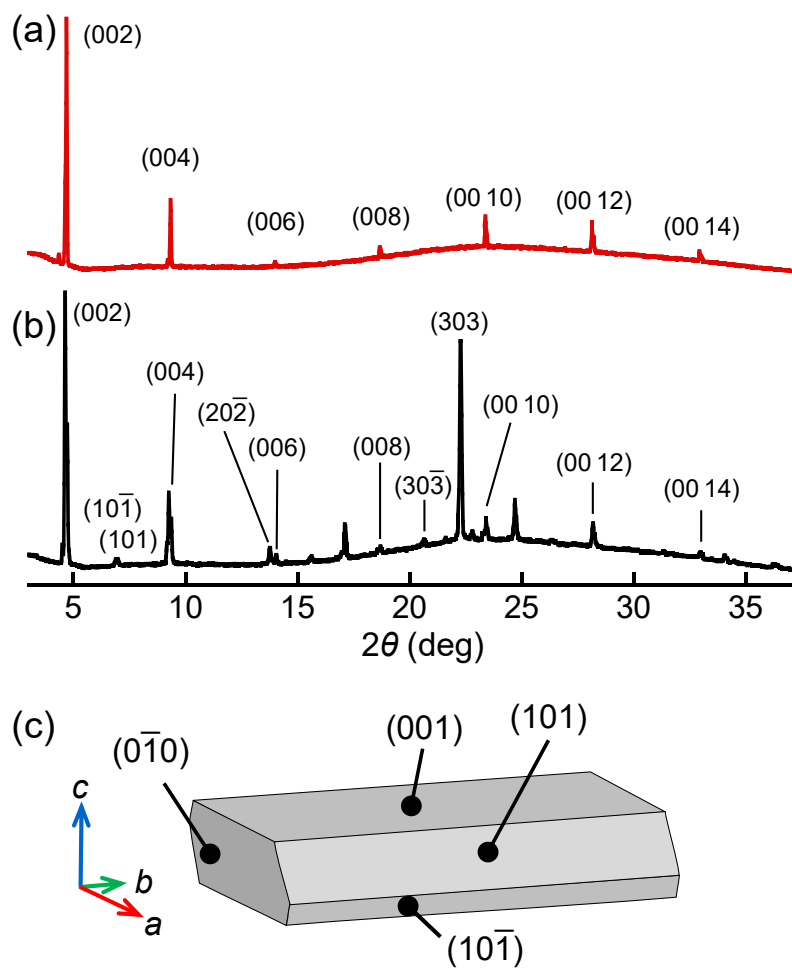

**Figure S1.** (a) PXRD pattern of crystal **1a** on the well-developed face of the crystals, (b) the pattern of slightly crushed crystal **1a**, and (c) the actual crystal shape and face indices.

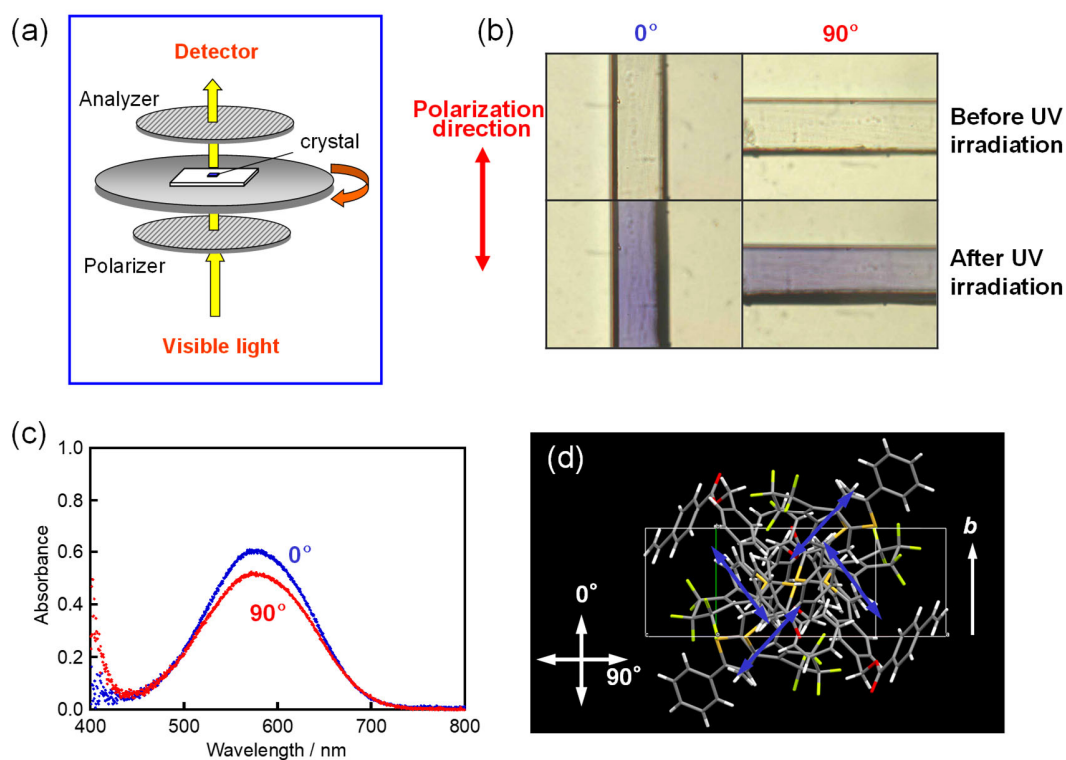

**Figure S2.** (a) Setup for the measurement of polarized absorption spectra, (b) optical microphotographs of crystal **1a** under polarized light before and after UV irradiation, (c) polarized absorption spectra, and (d) the molecular packing of **1a** viewed from the (001) plane. The blue arrows in (d) show the direction of the long axis of the molecule.

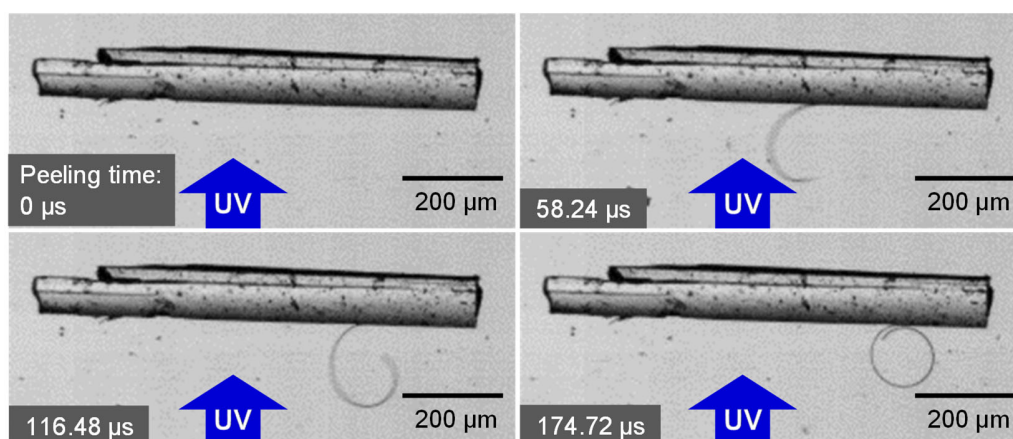

**Figure S3.** Photoinduced peeling of crystal **1a** upon irradiation with 365 nm light to the lateral face of the crystal. See **Video S3** in Supporting Information.

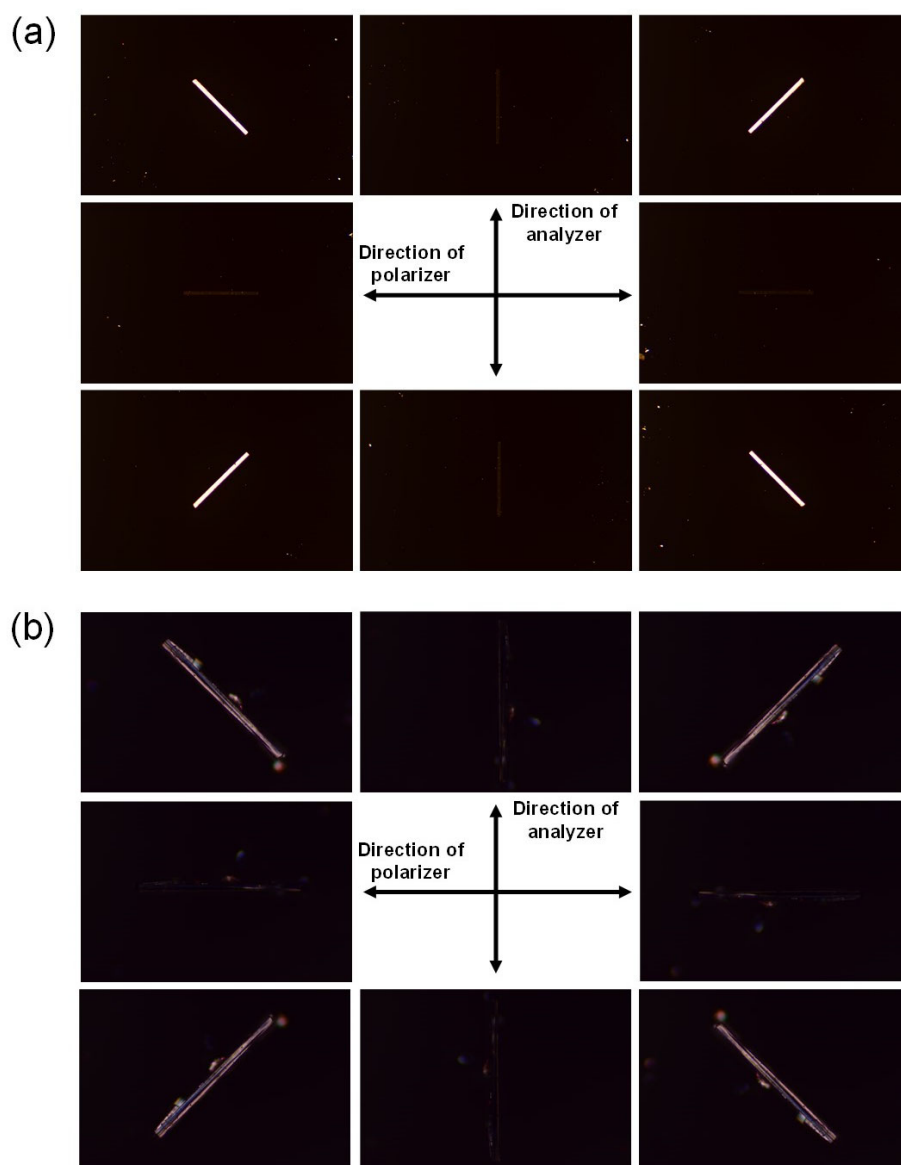

**Figure S4.** Optical microphotographs of (a) the peel and (b) the lateral face of the parent crystal of **1a** under crossed Nicols.

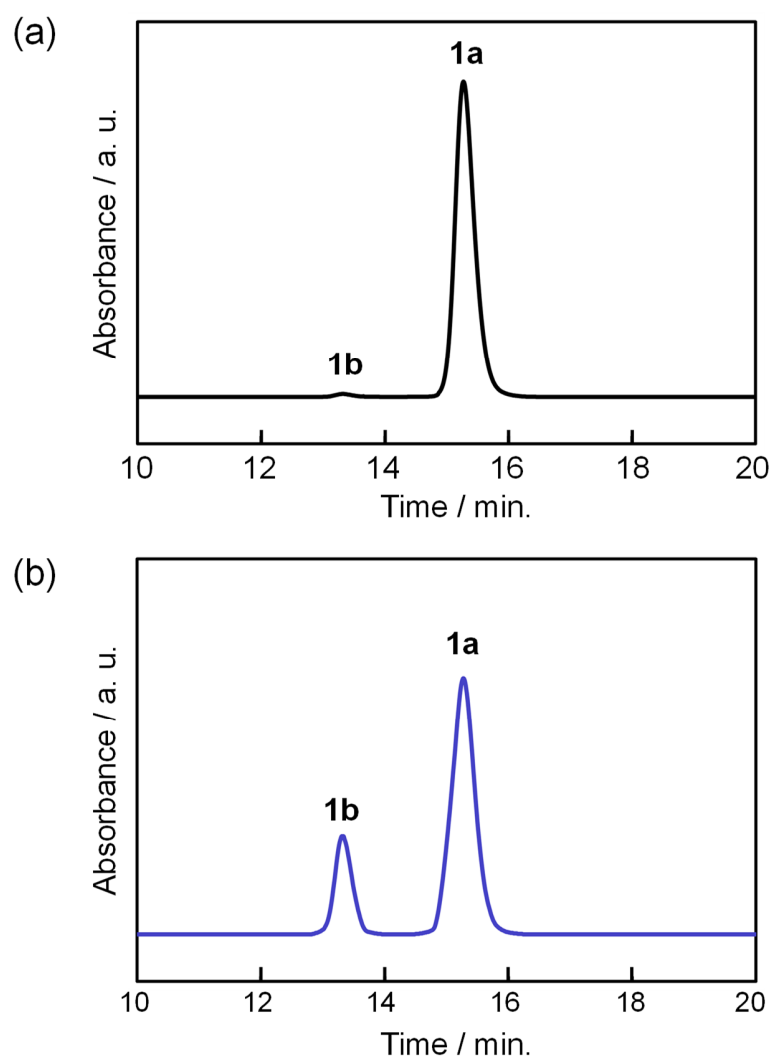

**Figure S5.** Representative HPLC chart of (a) crystals **1a** before UV irradiation and (b) the peels eliminated from the parent crystal after UV light irradiation. The peaks at 15.27 min and at 13.32 min indicate **1a** and **1b**, respectively. Crystals **1a** before UV light irradiation was composed of substantially **1a** (**1a** > 99%). On the other hand, the peels after UV light irradiation were composed of **1a** and **1b** in the ratio of 78:22. The composition of **1b** was ranging from 16 to 28% by measuring for several times with different peels.



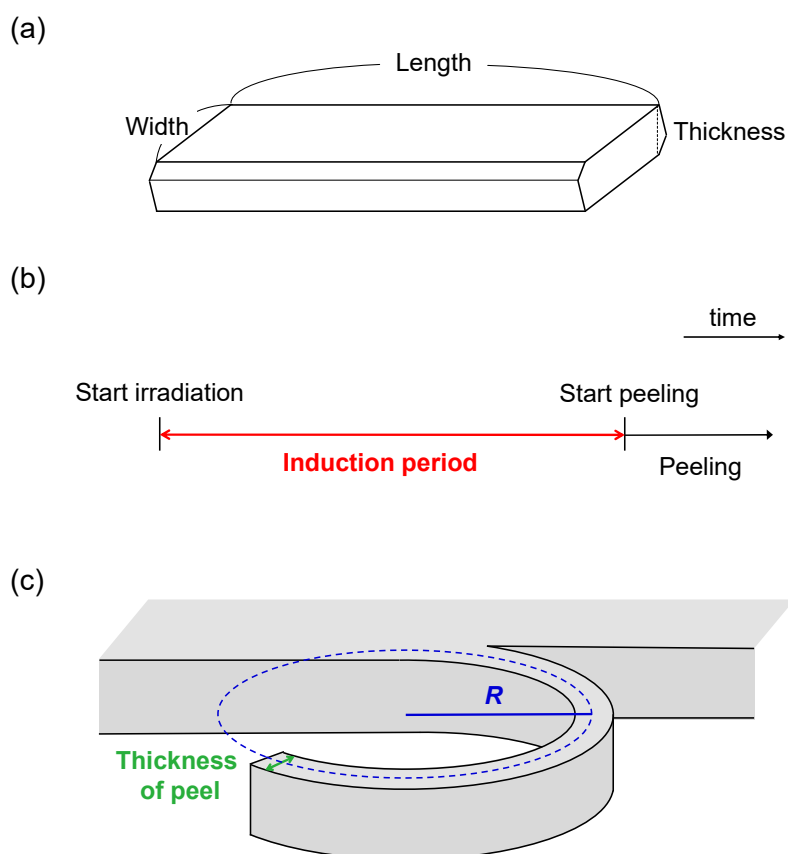

**Figure S6.** Definition of (a) crystal size; length, width, and thickness, (b) induction period (c) curvature radius  $1/R$ ; reciprocal of radius  $R$  of inscribed circle, and thickness of peel.

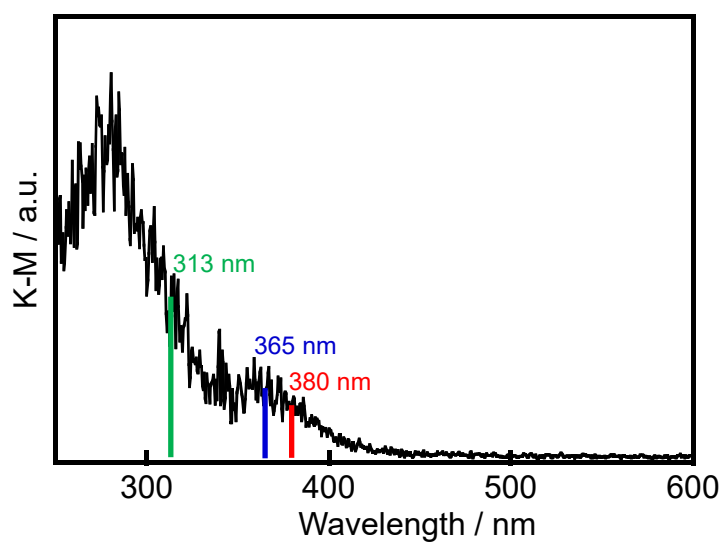

**Figure S7.** Diffuse reflectance spectrum of crystal **1a** with barium sulfate.

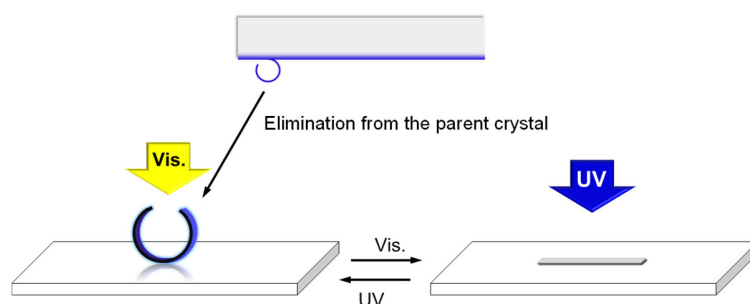

**Figure S8.** Schematic illustration of the preparation of the straightened peel by visible light irradiation.

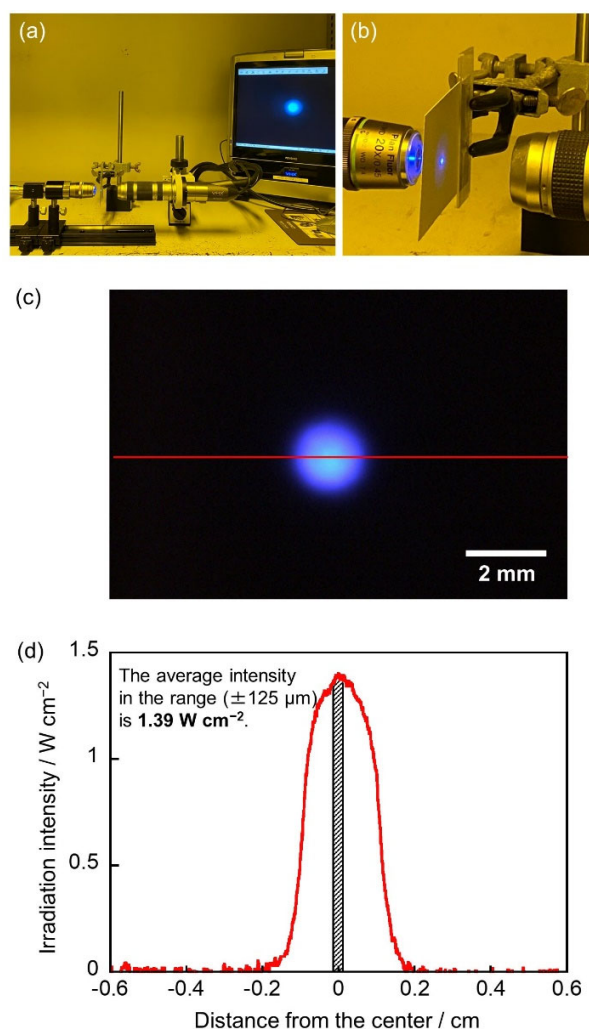

**Figure S9.** (a) Setup for determining the light intensity, (b) the enlarged picture of the fluorescent paper irradiated with high-power 365 nm light, (c) the fluorescence image of the fluorescent paper taken by a digital microscope, and (d) the irradiation intensity relative to distance from the center of the beam.
